# Supplementary material for: Framework as a Service, FaaS: Personalized Prebiotic Development for Infants with the Elements of Time and Parametric Modelling of In Vitro Fermentation
Source: MDPI journal article supplement (doi:10.3390/microorganisms8050623), 2020-04-25
Supplement: s1 [file s1]

**Table S2.** Parametric model fitted and the modelled parameters of dissolved ammonia, NH<sub>3</sub>. ProRate: maximum production rate; Lag: lag phase in NH<sub>3</sub> production; MaxConc: maximum NH<sub>3</sub> concentration increased. Data are provided as mean and standard deviation for each combination of carbohydrates and NH<sub>3</sub>.

| CHO       | model    | ProRate(mg/mL/hour) | ProRate_sd | Lag(hour) | Lag_sd | MaxConc(mg/mL) | MaxConc_sd |
|-----------|----------|---------------------|------------|-----------|--------|----------------|------------|
| barley_bG | gompertz | 0.008539            | 0.001142   | -9.407    | 3.44   | 0.407          | 0.01       |
| FOS       | logistic | 0.022895            | 0.01004    | -1.139    | 0.575  | 0.289          | 0.01       |
| glycogen  | logistic | 0.020539            | 0.003383   | -2.301    | 1.21   | 0.289          | 0.038      |
| glucose   | logistic | 0.008867            | 0.001601   | -7.473    | 2.162  | 0.189          | 0.012      |
| GOS       | logistic | 0.009539            | 0.001119   | -6.328    | 1.476  | 0.227          | 0.023      |
| inulin    | gompertz | 0.009379            | 0.000952   | -9.104    | 2.516  | 0.43           | 0.079      |
| lactose   | logistic | 0.020598            | 0.008833   | -1.761    | 0.603  | 0.279          | 0.01       |
| oat       | gompertz | 0.007106            | 0.003736   | -11.577   | 2.044  | 0.242          | 0.015      |
| ptr       | gompertz | 0.00818             | 0.001071   | -13.089   | 3.766  | 0.426          | 0.101      |
| starch    | logistic | 0.034657            | 0.011778   | 0.33      | 0.281  | 0.298          | 0.066      |
| sucrose   | logistic | 0.030926            | 0.006854   | 0.691     | 0.222  | 0.303          | 0.053      |
| XOS       | gompertz | 0.008602            | 0.001222   | -11.346   | 3.624  | 0.398          | 0.096      |
| xylitol   | gompertz | 0.012057            | 0.001541   | -5.794    | 1.999  | 0.365          | 0.065      |
