# Supplementary material for: Framework as a Service, FaaS: Personalized Prebiotic Development for Infants with the Elements of Time and Parametric Modelling of In Vitro Fermentation
Source: MDPI journal article supplement (doi:10.3390/microorganisms8050623), 2020-04-25
Supplement: s1 [file s1]

**Table S4.** Total short chain fatty acids, dissolved ammonia, total probiotic population and robust functional indicator at 24-hour and 48-hour of the 13 carbohydrates. Data are provided as mean and standard deviation for each carbohydrate.

| Carbohydrate | Targets | Hour | Mean    | sd    |
|--------------|---------|------|---------|-------|
| Glucose      | SCFAs   | 24   | 47.073  | 2.762 |
| Lactose      | SCFAs   | 24   | 379.501 | 2.595 |
| Sucrose      | SCFAs   | 24   | 20.527  | 1.349 |
| Xylitol      | SCFAs   | 24   | 31.264  | 2.138 |
| FOS          | SCFAs   | 24   | 144.467 | 2.310 |
| GOS          | SCFAs   | 24   | 239.387 | 3.217 |
| XOS          | SCFAs   | 24   | 34.774  | 3.353 |
| Oat_bG       | SCFAs   | 24   | 38.222  | 2.639 |
| Ptr_bG       | SCFAs   | 24   | 46.155  | 3.482 |
| Barley_bG    | SCFAs   | 24   | 88.174  | 1.258 |
| Glycogen     | SCFAs   | 24   | 142.249 | 2.923 |
| Starch       | SCFAs   | 24   | 40.233  | 3.226 |
| Inulin       | SCFAs   | 24   | 37.566  | 3.424 |
| Glucose      | SCFAs   | 48   | 50.821  | 0.925 |
| Lactose      | SCFAs   | 48   | 419.498 | 1.606 |
| Sucrose      | SCFAs   | 48   | 100.656 | 1.650 |
| Xylitol      | SCFAs   | 48   | 105.461 | 4.180 |
| FOS          | SCFAs   | 48   | 134.428 | 4.674 |
| GOS          | SCFAs   | 48   | 285.751 | 1.924 |
| XOS          | SCFAs   | 48   | 67.505  | 5.780 |
| Oat_bG       | SCFAs   | 48   | 42.484  | 2.102 |
| Ptr_bG       | SCFAs   | 48   | 104.804 | 4.823 |
| Barley_bG    | SCFAs   | 48   | 281.636 | 3.968 |
| Glycogen     | SCFAs   | 48   | 183.434 | 2.597 |
| Starch       | SCFAs   | 48   | 53.504  | 4.142 |
| Inulin       | SCFAs   | 48   | 136.274 | 4.927 |
| Barley_bG    | NH3     | 24   | 0.297   | 0.046 |
| FOS          | NH3     | 24   | 0.259   | 0.014 |
| Glycogen     | NH3     | 24   | 0.187   | 0.012 |
| Glucose      | NH3     | 24   | 0.273   | 0.069 |
| GOS          | NH3     | 24   | 0.221   | 0.015 |
| Inulin       | NH3     | 24   | 0.285   | 0.017 |
| Lactose      | NH3     | 24   | 0.290   | 0.017 |
| Oat_bG       | NH3     | 24   | 0.226   | 0.029 |
| Ptr_bG       | NH3     | 24   | 0.309   | 0.067 |
| Starch       | NH3     | 24   | 0.256   | 0.020 |
| Sucrose      | NH3     | 24   | 0.292   | 0.015 |
| XOS          | NH3     | 24   | 0.306   | 0.019 |
| Xylitol      | NH3     | 24   | 0.291   | 0.015 |
| Barley_bG    | NH3     | 48   | 0.349   | 0.011 |
| FOS          | NH3     | 48   | 0.271   | 0.054 |
| Glycogen     | NH3     | 48   | 0.180   | 0.016 |
| Glucose      | NH3     | 48   | 0.276   | 0.034 |
| GOS          | NH3     | 48   | 0.239   | 0.015 |
| Inulin       | NH3     | 48   | 0.407   | 0.010 |
| Lactose      | NH3     | 48   | 0.252   | 0.056 |
| Oat_bG       | NH3     | 48   | 0.221   | 0.012 |
| Ptr_bG       | NH3     | 48   | 0.342   | 0.014 |
| Starch       | NH3     | 48   | 0.308   | 0.062 |
| Sucrose      | NH3     | 48   | 0.297   | 0.091 |
| XOS          | NH3     | 48   | 0.360   | 0.017 |
| Xylitol      | NH3     | 48   | 0.370   | 0.084 |

|           |           |    |          |        |
|-----------|-----------|----|----------|--------|
| Barley_bG | Probiotic | 24 | 8320000  | 19998  |
| FOS       | Probiotic | 24 | 18300000 | 377285 |
| Glycogen  | Probiotic | 24 | 19770000 | 580752 |
| Glucose   | Probiotic | 24 | 17020000 | 124600 |
| GOS       | Probiotic | 24 | 10540000 | 147700 |
| Inulin    | Probiotic | 24 | 19660000 | 122249 |
| Lactose   | Probiotic | 24 | 11890000 | 491024 |
| Oat_bG    | Probiotic | 24 | 16260000 | 143900 |
| Ptr_bG    | Probiotic | 24 | 18370000 | 148964 |
| Starch    | Probiotic | 24 | 22980000 | 170100 |
| Sucrose   | Probiotic | 24 | 21770000 | 726724 |
| XOS       | Probiotic | 24 | 16860000 | 985399 |
| Xylitol   | Probiotic | 24 | 16810000 | 202900 |
| Barley_bG | Probiotic | 48 | 13280000 | 901807 |
| FOS       | Probiotic | 48 | 7530000  | 11840  |
| Glycogen  | Probiotic | 48 | 20030000 | 1322   |
| Glucose   | Probiotic | 48 | 1030000  | 175    |
| GOS       | Probiotic | 48 | 3160000  | 30006  |
| Inulin    | Probiotic | 48 | 14970000 | 962748 |
| Lactose   | Probiotic | 48 | 300      | 3      |
| Oat_bG    | Probiotic | 48 | 18370000 | 1054   |
| Ptr_bG    | Probiotic | 48 | 18350000 | 149899 |
| Starch    | Probiotic | 48 | 25410000 | 189280 |
| Sucrose   | Probiotic | 48 | 28540000 | 311603 |
| XOS       | Probiotic | 48 | 22120000 | 1096   |
| Xylitol   | Probiotic | 48 | 24470000 | 180061 |
| Barley_bG | SCFAs/NH3 | 24 | 0.269    | 0.036  |
| FOS       | SCFAs/NH3 | 24 | 0.422    | 0.126  |
| Glucose   | SCFAs/NH3 | 24 | 0.386    | 0.133  |
| Glycogen  | SCFAs/NH3 | 24 | 0.364    | 0.022  |
| GOS       | SCFAs/NH3 | 24 | 0.699    | 0.291  |
| Inulin    | SCFAs/NH3 | 24 | 0.245    | 0.091  |
| Lactose   | SCFAs/NH3 | 24 | 0.722    | 0.274  |
| Oat_bG    | SCFAs/NH3 | 24 | 0.274    | 0.050  |
| Ptr_bG    | SCFAs/NH3 | 24 | 0.210    | 0.019  |
| Starch    | SCFAs/NH3 | 24 | 0.330    | 0.211  |
| Sucrose   | SCFAs/NH3 | 24 | 0.206    | 0.055  |
| XOS       | SCFAs/NH3 | 24 | 0.232    | 0.098  |
| Xylitol   | SCFAs/NH3 | 24 | 0.220    | 0.057  |
| Barley_bG | SCFAs/NH3 | 48 | 0.436    | 0.035  |
| FOS       | SCFAs/NH3 | 48 | 0.355    | 0.039  |
| Glucose   | SCFAs/NH3 | 48 | 0.534    | 0.393  |
| Glycogen  | SCFAs/NH3 | 48 | 0.414    | 0.070  |
| GOS       | SCFAs/NH3 | 48 | 0.635    | 0.149  |
| Inulin    | SCFAs/NH3 | 48 | 0.242    | 0.016  |
| Lactose   | SCFAs/NH3 | 48 | 0.786    | 0.063  |
| Oat_bG    | SCFAs/NH3 | 48 | 0.311    | 0.087  |
| Ptr_bG    | SCFAs/NH3 | 48 | 0.261    | 0.038  |
| Starch    | SCFAs/NH3 | 48 | 0.220    | 0.023  |
| Sucrose   | SCFAs/NH3 | 48 | 0.287    | 0.017  |
| XOS       | SCFAs/NH3 | 48 | 0.217    | 0.053  |
| Xylitol   | SCFAs/NH3 | 48 | 0.234    | 0.018  |
