# Supplementary material for: Framework as a Service, FaaS: Personalized Prebiotic Development for Infants with the Elements of Time and Parametric Modelling of In Vitro Fermentation
Source: MDPI journal article supplement (doi:10.3390/microorganisms8050623), 2020-04-25
Supplement: s1 [file s1]

**Table S3.** Additive parametric models fitted and the modelled parameters of total probiotic population. The model is composed of two addition models. GroRate: maximum total probiotic growth rate; Lag: lag phase; MaxCFU: maximum total probiotic population increase; tx: tipping point; DeclineRate: maximum population decline rate in the decline phase; DeclineLag: lag phase of the decline phase, representing the sustainability; DeclineMaxCFU: maximum total probiotic population decrease from MaxCFU. Data are provided as mean and standard deviation for each carbohydrate.

| CHO       | Gro.model | GroRate(CFU/hour) | GroRate_sd | Lag(hour) | Lag_sd | MaxCFU(CFU) | MaxCFU_sd | tx(hour) | Decline.model | DeclineRate(CFU/hour) | DeclineRate_sd | DeclineLag(hour) | DeclineLag_sd | DeclineMaxCFU(CFU) | DeclineMaxCFU_sd |
|-----------|-----------|-------------------|------------|-----------|--------|-------------|-----------|----------|---------------|-----------------------|----------------|------------------|---------------|--------------------|------------------|
| barley_bG | gompertz  | 323577            | 54915      | -3.053    | 3.755  | 13397269    | 430550    | 49       | gompertz      | 243100                | 57393          | -6.214           | 6.511         | 12783905           | 642282           |
| FOS       | logistic  | 3151759           | 123668     | 6.891     | 0.122  | 19370531    | 14776     | 22       | logistic      | 398844                | 33788          | 61.414           | 2.119         | 19686610           | 422486           |
| glycogen  | logistic  | 6168639           | 129400     | 5.413     | 0.076  | 20620064    | 14121     | 22       | gompertz      | 768132                | 109460         | 75.135           | 1.712         | 20307328           | 561119           |
| glucose   | gompertz  | 3864303           | 1626769    | 4.728     | 1.961  | 19419555    | 418807    | 49       | logistic      | 509859                | 109487         | 47.542           | 4.949         | 20631162           | 1019025          |
| GOS       | logistic  | 6212723           | 60161      | 5.694     | 0.037  | 18690008    | 4256      | 22       | gompertz      | 429131                | 65358          | 72.671           | 2.967         | 18816852           | 741785           |
| inulin    | logistic  | 4764834           | 283188     | 6.802     | 0.190  | 21090019    | 17881     | 22       | gompertz      | 158792                | 28165          | -30.317          | 11.829        | 22066977           | 1762883          |
| lactose   | logistic  | 7628096           | 2734233    | 5.039     | 1.864  | 13930115    | 11217     | 22       | gompertz      | 877039                | 5614           | 91.859           | 0.045         | 13611321           | 10080            |
| oat_bG    | logistic  | 11482547          | 4595632    | 5.069     | 2.142  | 20310127    | 14199     | 10       | logistic      | 576199                | 101107         | 49.089           | 3.284         | 18986417           | 680848           |
| ptr_bG    | gompertz  | 2603498           | 590055     | 4.898     | 1.104  | 18036055    | 186696    | 49       | logistic      | 921602                | 563748         | 12.043           | 7.270         | 15789795           | 862328           |
| starch    | gompertz  | 5493720           | 2515862    | 4.830     | 2.137  | 24398085    | 455172    | 49       | logistic      | 485511                | 70859          | 24.057           | 4.300         | 25769021           | 941953           |
| sucrose   | gompertz  | 873362            | 160935     | -2.002    | 3.203  | 28470397    | 880793    | 49       | logistic      | 1072067               | 189136         | 54.411           | 2.882         | 28951961           | 969204           |
| XOS       | logistic  | 5129119           | 1279393    | 6.388     | 4.496  | 21305007    | 505656    | 49       | gompertz      | 920967                | 189349         | 7.623            | 3.047         | 21244251           | 582666           |
| xylitol   | gompertz  | 621769            | 98584      | -1.847    | 3.377  | 24615515    | 729690    | 49       | gompertz      | 1313764               | 318506         | 47.474           | 2.236         | 24635957           | 775826           |
