# Supplementary material for: Framework as a Service, FaaS: Personalized Prebiotic Development for Infants with the Elements of Time and Parametric Modelling of In Vitro Fermentation
Source: MDPI journal article supplement (doi:10.3390/microorganisms8050623), 2020-04-25
Supplement: s1 [file s1]

**Table S1.** Parametric model fitted and the modelled parameters of short chain fatty acids profile. Short chain fatty acids (SCFAs), include acetate, propionate, butyrate and total SCFA of the 13 carbohydrates fermentation temporal patterns. ProRate: maximum production rate; Lag: lag phase in SCFAs production; MaxConc: maximum SCFAs concentration increase. Data are provided as mean and standard deviation for each combination of carbohydrates and SCFAs.

| CHO       | SCFAs     | model        | ProRate(mM/hour) | ProRate_sd | Lag(hour) | Lag_sd  | MaxConc(mM) | MaxConc_sd |
|-----------|-----------|--------------|------------------|------------|-----------|---------|-------------|------------|
| barley_bG | All       | gompertz     | 14.468           | 0.833      | 26.932    | 2.248   | 1236.164    | 39.933     |
| FOS       | All       | gompertz     | 6.225            | 1.312      | 3.765     | 3.092   | 156.919     | 5.463      |
| glucose   | All       | gompertz     | 1.054            | 0.245      | -12.075   | 7.55    | 65.669      | 3.929      |
| glycogen  | All       | gompertz     | 5.288            | 0.73       | 0.609     | 0.611   | 219.502     | 6.548      |
| GOS       | All       | gompertz     | 7.537            | 1.234      | 1.269     | 0.836   | 378.587     | 15.556     |
| inulin    | All       | logistic     | 14.261           | 1.414      | 50.711    | 3.347   | 959.384     | 43.494     |
| lactose   | All       | gompertz     | 17.534           | 3.945      | 5.546     | 3.718   | 482.193     | 17.918     |
| oat       | All       | gompertz     | 1.927            | 0.538      | -1.561    | 0.711   | 49.162      | 2.096      |
| ptr       | All       | gompertz     | 2.346            | 0.196      | 10.424    | 5.235   | 410.91      | 40.472     |
| starch    | All       | gompertz     | 1.002            | 0.117      | -9.853    | 6.544   | 128.048     | 10.143     |
| sucrose   | All       | logistic     | 4.073            | 0.314      | 28.991    | 2.573   | 249.832     | 7.254      |
| XOS       | All       | logistic     | 3.678            | 0.271      | 55.45     | 4.501   | 563.074     | 47.432     |
| xylitol   | All       | logistic     | 5.396            | 0.498      | 29.511    | 2.689   | 286.651     | 8.44       |
| barley_bG | Acetic    | gompertz     | 1.275            | 0.085      | 12.824    | 4.137   | 223.488     | 17.822     |
| FOS       | Acetic    | gompertz     | 6.045            | 1.302      | 4.667     | 3.13    | 147.383     | 5.115      |
| glucose   | Acetic    | gompertz     | 1.093            | 0.259      | -9.514    | 7.045   | 62.574      | 3.674      |
| glycogen  | Acetic    | gompertz     | 5.089            | 0.704      | 1.276     | 0.61    | 209.995     | 6.235      |
| GOS       | Acetic    | gompertz     | 7.547            | 1.246      | 1.486     | 0.837   | 375.826     | 15.458     |
| inulin    | Acetic    | logistic     | 2.17             | 0.269      | 31.545    | 5.44    | 186.751     | 12.427     |
| lactose   | Acetic    | gompertz     | 17.518           | 3.989      | 5.892     | 3.73    | 474.295     | 17.556     |
| oat       | Acetic    | gompertz     | 2.031            | 0.596      | -0.634    | 0.677   | 47.545      | 2.021      |
| ptr       | Acetic    | gompertz     | 0.356            | 0.053      | -21.3     | 12.042  | 77.927      | 15.369     |
| starch    | Acetic    | gompertz     | 0.934            | 0.106      | -7.125    | 6.293   | 119.196     | 9.442      |
| sucrose   | Acetic    | logistic     | 4.226            | 0.382      | 32.411    | 2.599   | 221.387     | 6.457      |
| XOS       | Acetic    | logistic     | 0.895            | 0.085      | 34.264    | 12.042  | 211.675     | 44.362     |
| xylitol   | Acetic    | logistic     | 4.169            | 0.452      | 29.631    | 3.094   | 216.359     | 7.292      |
| barley_bG | Butyric   | gompertz     | 10.73            | 0.653      | 26.614    | 2.285   | 869.024     | 28.232     |
| FOS       | Butyric   | logistic     | 0.059            | 0.018      | -14.667   | 8.181   | 2.628       | 0.115      |
| glucose   | Butyric   | gompertz.exp | NA               | NA         | NA        | NA      | NA          | NA         |
| glycogen  | Butyric   | gompertz     | 0.025            | 0.007      | -36.019   | 14.195  | 1.842       | 0.089      |
| GOS       | Butyric   | gompertz     | 0.014            | 0.003      | -70.879   | 20.877  | 2.158       | 0.164      |
| inulin    | Butyric   | logistic     | 3.685            | 0.796      | 61.062    | 6.813   | 239.739     | 23.902     |
| lactose   | Butyric   | gompertz     | 0.013            | 0.005      | -87.648   | 40.554  | 2.68        | 0.46       |
| oat       | Butyric   | logistic     | 0.005            | 0.001      | -178.023  | 48.985  | 1.638       | 0.194      |
| ptr       | Butyric   | gompertz     | 2.241            | 0.661      | 18.405    | 3.453   | 56.913      | 2.433      |
| starch    | Butyric   | logistic     | 0.016            | 0.003      | -55.213   | 21.387  | 3.336       | 0.504      |
| sucrose   | Butyric   | logistic     | 0.196            | 0.043      | 30.229    | 13.338  | 27.703      | 4.856      |
| XOS       | Butyric   | gompertz     | 3.227            | 2.68       | 277.227   | 130.946 | 3016.806    | 3303.965   |
| xylitol   | Butyric   | logistic     | 1.083            | 0.222      | 33.642    | 5.805   | 55.934      | 3.678      |
| barley_bG | Propionic | logistic     | 3.396            | 0.356      | 45.142    | 2.818   | 165.474     | 5.794      |
| FOS       | Propionic | logistic     | 1.486            | 1.033      | 5.192     | 2.979   | 6.571       | 0.246      |
| glucose   | Propionic | logistic     | 0.011            | 0.003      | -104.339  | 32.062  | 2.299       | 0.186      |
| glycogen  | Propionic | logistic     | 1.584            | 0.811      | 5.075     | 2.208   | 7.296       | 0.217      |
| GOS       | Propionic | logistic     | 0.005            | 0.001      | -20.472   | 9.641   | 0.551       | 0.04       |
| inulin    | Propionic | logistic     | 9.263            | 0.759      | 54.316    | 2.384   | 528.63      | 17.238     |
| lactose   | Propionic | logistic     | 0.475            | 0.225      | 1.279     | 0.586   | 5.37        | 0.229      |
| oat       | Propionic | logistic     | 0                | 0          | -262.348  | 125.664 | 0.231       | 0.063      |
| ptr       | Propionic | gompertz     | 1.651            | 0.151      | 36.441    | 4.894   | 272.079     | 30.212     |
| starch    | Propionic | gompertz     | 0.737            | 0.372      | 4.183     | 2.337   | 5.077       | 0.204      |
| sucrose   | Propionic | gompertz     | 0.132            | 0.043      | -2.668    | 1.303   | 4.98        | 0.324      |
| XOS       | Propionic | gompertz     | 2.381            | 0.276      | 65.7      | 4.15    | 249.709     | 19.241     |
| xylitol   | Propionic | logistic     | 0.194            | 0.038      | 12.722    | 7.727   | 14.349      | 1.13       |
