# Supplementary material for: Framework as a Service, FaaS: Personalized Prebiotic Development for Infants with the Elements of Time and Parametric Modelling of In Vitro Fermentation
Source: MDPI journal article supplement (doi:10.3390/microorganisms8050623), 2020-04-25

**Figure S2:** Individual short chain fatty acids produced by fermentation of carbohydrates using infant faecal inoculum. **(a)** Acetic acid at time = 24 hour; **(b)** acetic acid at time = 48 hour; **(c)** propionic acid at time = 24 hour; **(d)** propionic acid at time = 48 hour; **(e)** butyric acid at time = 24 hour; **(f)** butyric acid at time = 48 hour.

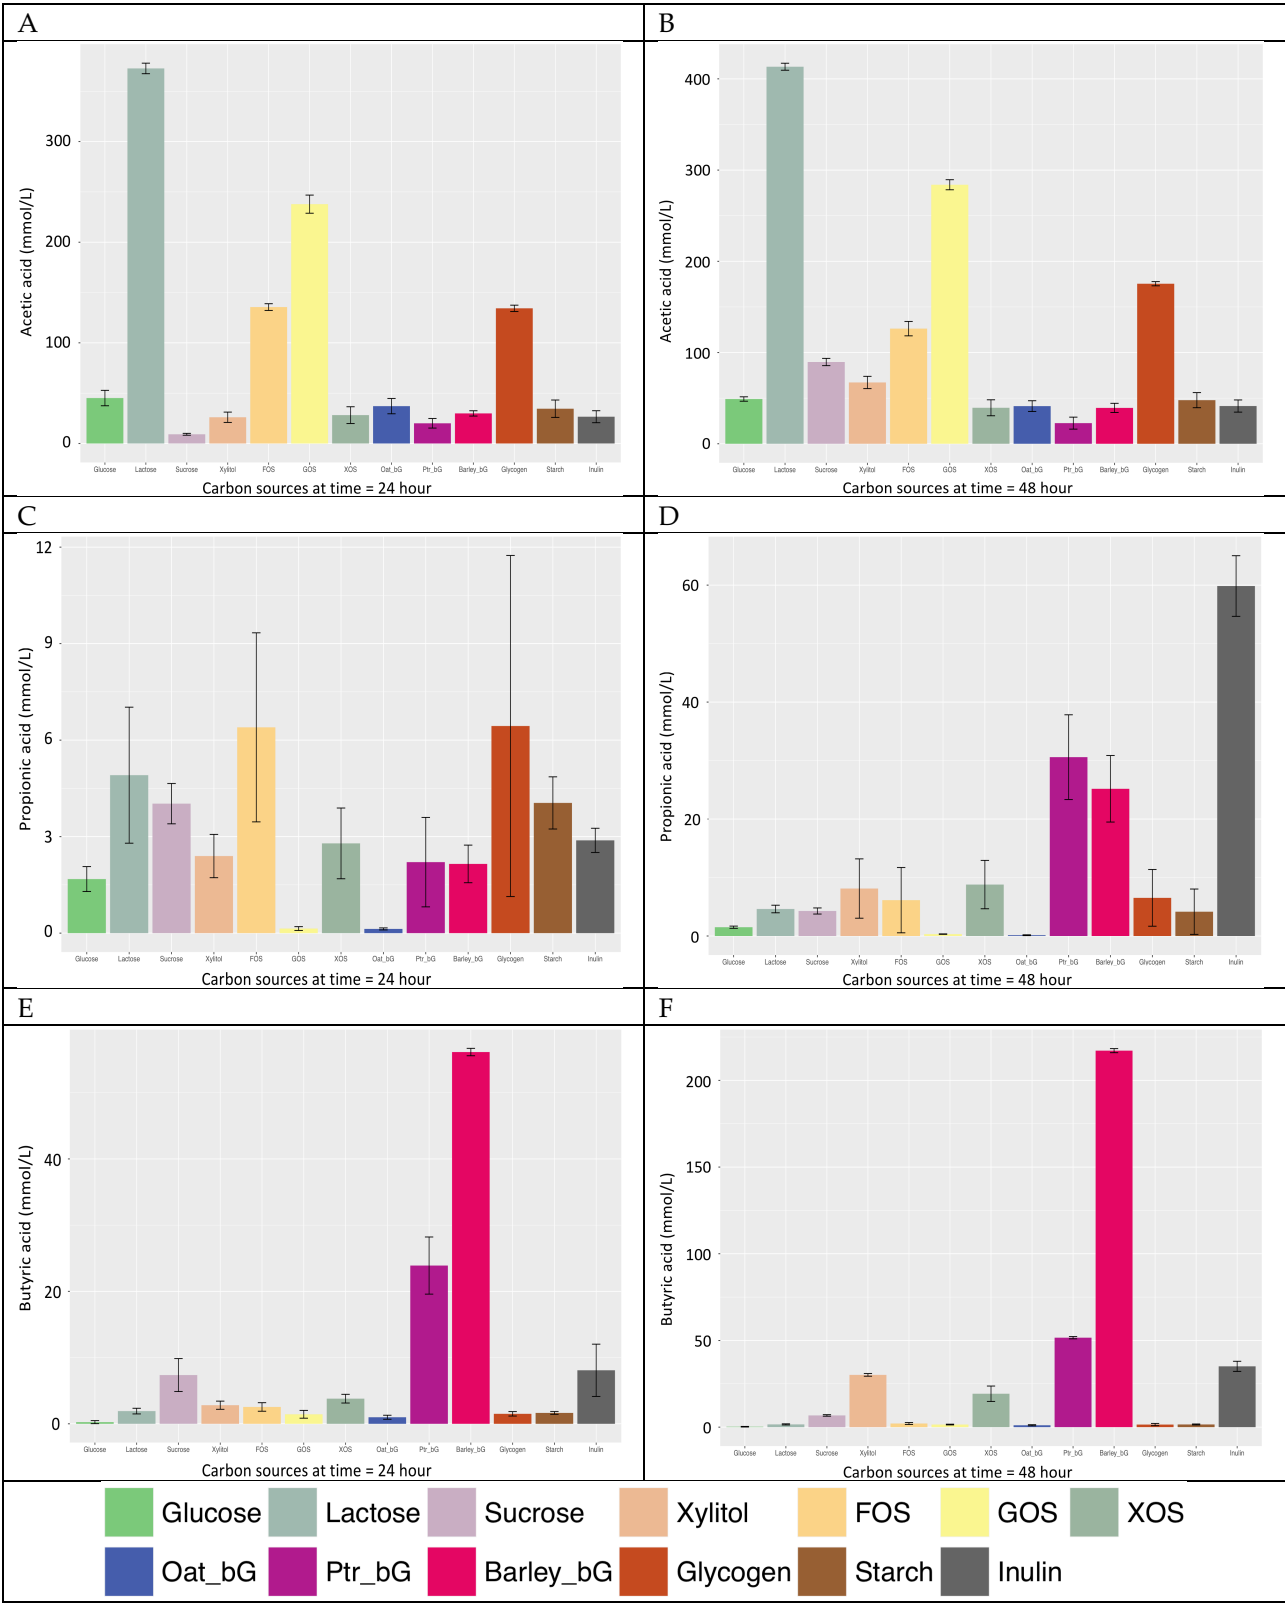

Supplement: s1 [file s1]
