# Supplementary material for: Framework as a Service, FaaS: Personalized Prebiotic Development for Infants with the Elements of Time and Parametric Modelling of In Vitro Fermentation
Source: Microorganisms. 2020 Apr 25;8(5):623. doi: 10.3390/microorganisms8050623 (PMC7285508; doi:10.3390/microorganisms8050623)
Supplement: Supplementary file 1 [file microorganisms-08-00623-s001.zip]

Archive with 14 entries (14 files):
- FigureS1.pdf
- __MACOSX/._FigureS1.pdf
- FigureS2.pdf
- __MACOSX/._FigureS2.pdf
- FigureS3.pdf
- __MACOSX/._FigureS3.pdf
- TableS1.pdf
- __MACOSX/._TableS1.pdf
- TableS2.pdf
- __MACOSX/._TableS2.pdf
- TableS3.pdf
- __MACOSX/._TableS3.pdf
- TableS4.pdf
- __MACOSX/._TableS4.pdf
